# Supplementary material for: Simple and Highly Efficient Detection of PSD95 Using a Nanobody and Its Recombinant Heavy-Chain Antibody Derivatives
Source: MDPI journal article supplement (doi:10.3390/ijms24087294), 2023-04-14
Supplement: s1 [file s1]

## Supplementary information

### **Simple and Highly Efficient Detection of PSD95 Using a Nanobody and Its Recombinant Heavy-chain Antibody Derivatives**

Markus Kilisch<sup>1</sup>, Maja Gere-Becker<sup>1</sup>, Liane Wüstefeld<sup>2</sup>, Christel Bonnas<sup>2</sup>, Alexander Crauel<sup>1</sup>, Maja Mechmershausen<sup>1</sup>, Henrik Martens<sup>2</sup>, Hansjörg Götzke<sup>1</sup>, Felipe Opazo<sup>1,3,4\*</sup>, Steffen Frey<sup>1\*</sup>

<sup>1</sup>NanoTag Biotechnologies GmbH, Rudolf-Wissell-Straße 28a, 37079 Göttingen.

<sup>2</sup>Synaptic Systems GmbH, Rudolf-Wissell-Straße 28a, 37079 Göttingen.

<sup>3</sup>Institute of Neuro- and Sensory Physiology, University Medical Center Göttingen, 37073 Göttingen, Germany.

<sup>4</sup>Center for Biostructural Imaging of Neurodegeneration (BIN), University of Göttingen Medical Center, 37075 Göttingen, Germany.

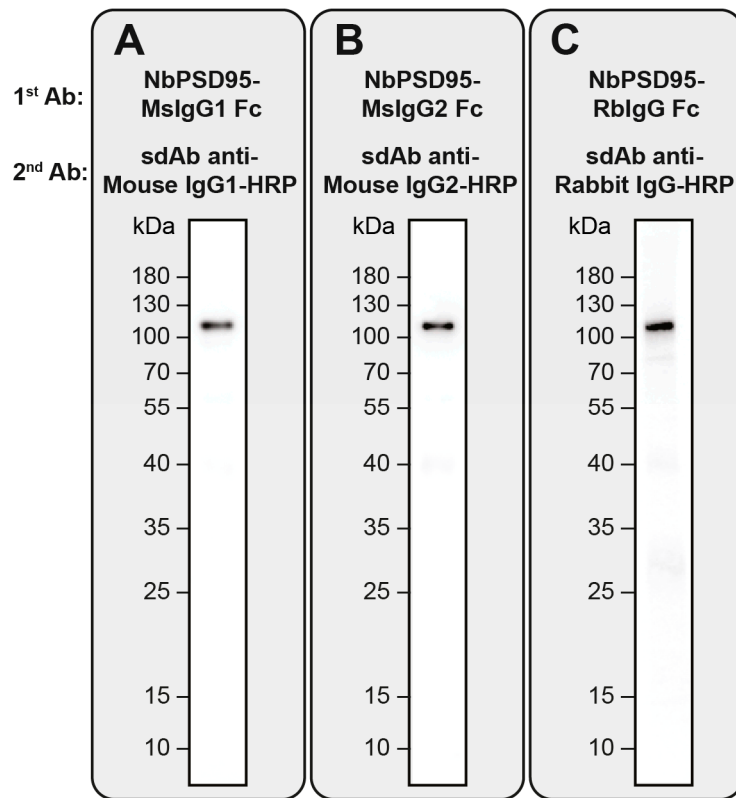

**Figure S1: anti-PSD95 r-hcAbs harboring different Fc domains specifically recognize PSD95 in Western blot applications.**

Total mouse brain lysates were analyzed by Western blot using r-hcAbs consisting of NbPSD95 fused to a Fc domain from either mouse IgG1 (MsIgG1 Fc; **A**), mouse IgG2 (MsIgG2 Fc; **B**) or rabbit IgG (RblgG Fc; **C**). Detection was performed using HRP-coupled secondary nanobodies recognizing the respective Fc domains. All three r-hcAbs detected PSD95 with similar specificity.

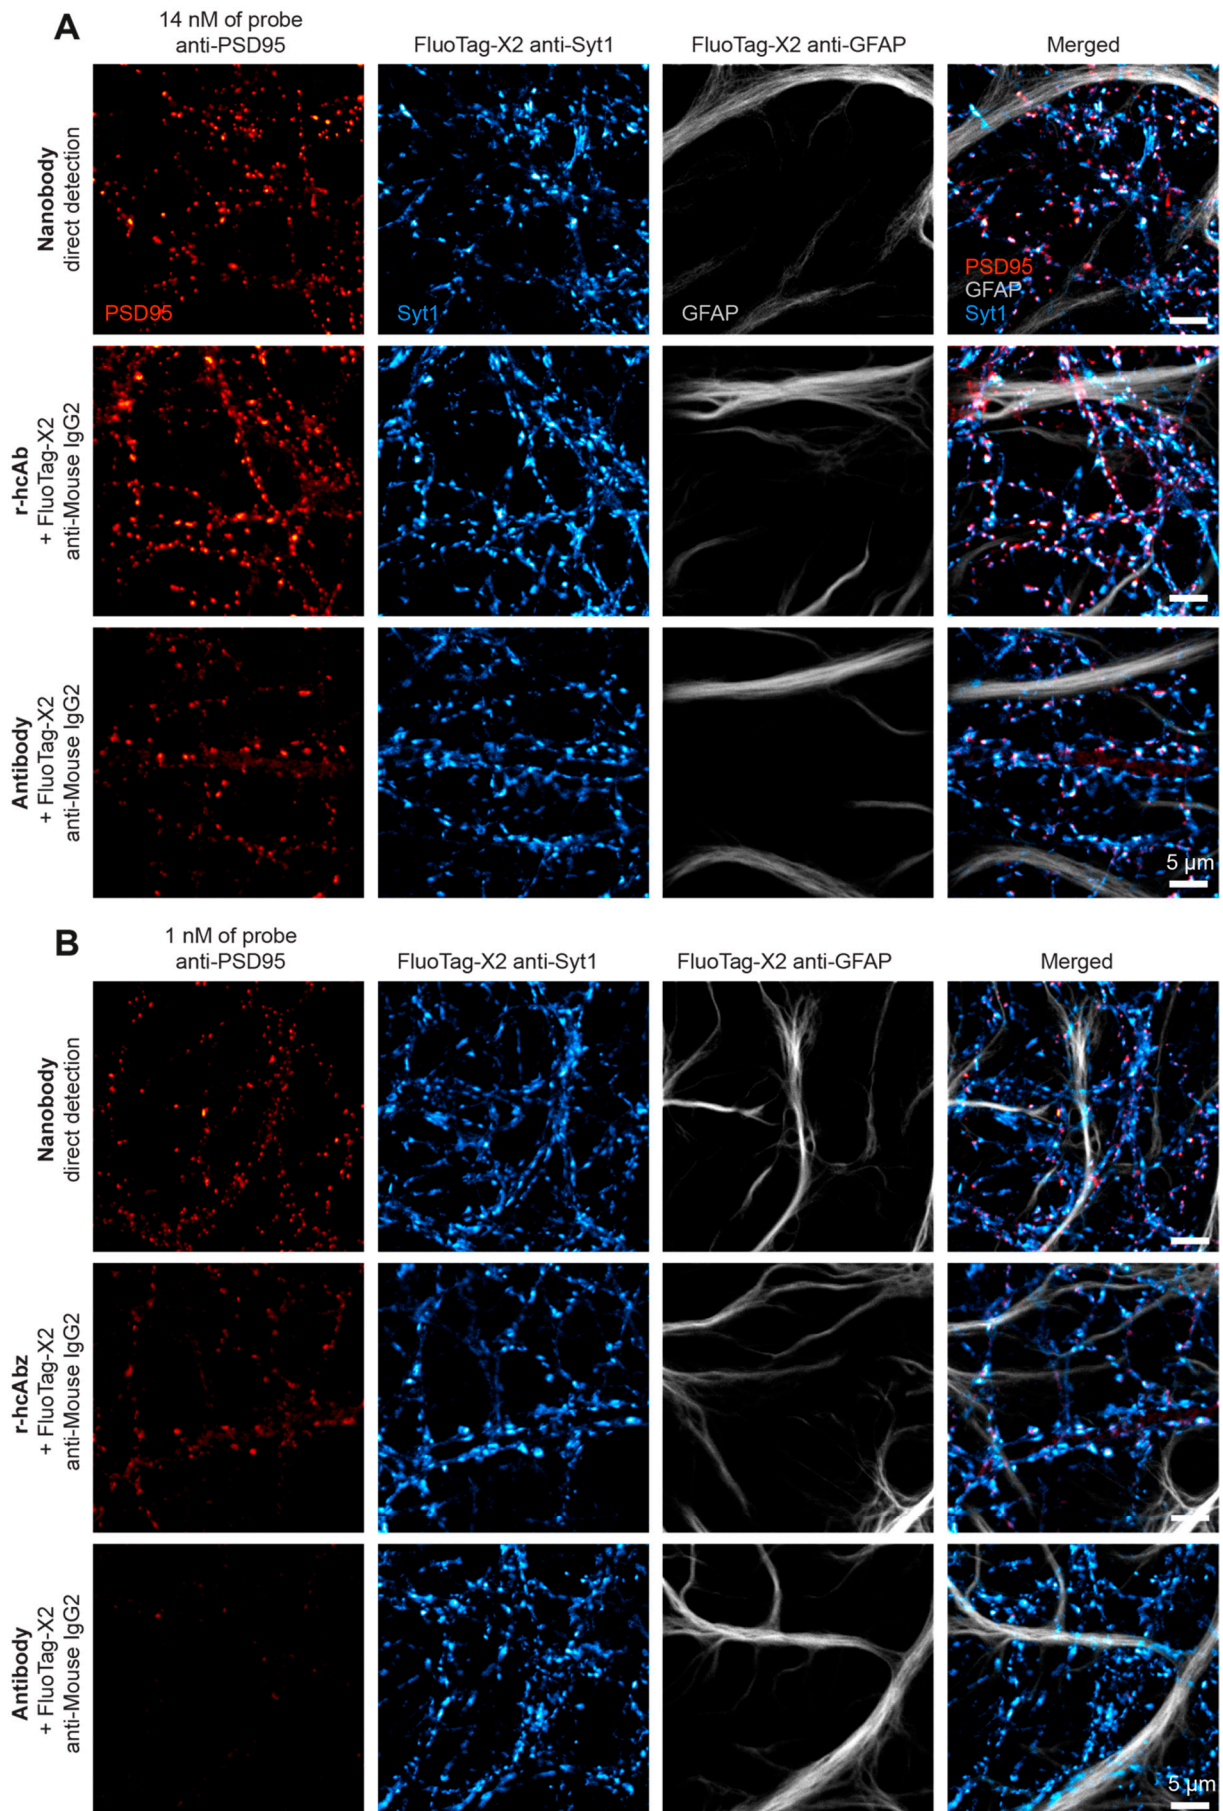

**Figure S2: Comparison of NbPSD95 with an anti-PSD95 r-hcAb and a conventional antibody – related to Fig. 3.** Figure shows separate channels used for creating overlays displayed in Fig. 3.

**Table S1: Antibodies**

| Figure           | Panel(s)                         | Product                                                        | Product number | Provider                | Description                                         | Application                                      | Dilution/<br>Conc. |
|------------------|----------------------------------|----------------------------------------------------------------|----------------|-------------------------|-----------------------------------------------------|--------------------------------------------------|--------------------|
| Fig. 2A          |                                  | Monoclonal anti-FLAG HRP                                       | A8592          | Merck                   | HRP-conjugated anti-FLAG antibody (clone M2)        | ELISA                                            | 1:5000             |
| Fig. 2B          | upper panels                     | FluoTag-X2 anti-PSD95 AZDye568                                 | N3702-AF568-L  | NanoTag Biotechnologies | Fluorophore-conjugated NbPSD95                      | IF, direct                                       | 1:500              |
| Fig. 2C          | upper left panel                 | Recombinant anti-PSD95 Antibody (R-hcAb), Mouse IgG1 Fc fusion | N3782          | NanoTag Biotechnologies | NbPSD95 fused to mouse IgG1 Fc domain               | WB, 1 <sup>st</sup> Ab                           | 1:1000             |
| Fig. 2C          | lower panels                     | Mouse anti-beta-Actin                                          | 251 011        | Synaptic Systems        | Monoclonal antibody                                 | WB, 1 <sup>st</sup> Ab                           | 1:1000             |
| Fig. 2C          | upper right panel + lower panels | sdAb anti-MsIgG1 HRP                                           | N2005-HRP      | NanoTag Biotechnologies | HRP-conjugated anti-Mouse IgG1 nanobody             | WB, 2 <sup>nd</sup> Ab                           | 1:4000             |
| Fig. 2C          | upper right panel                | Recombinant anti-PSD95 Antibody (R-hcAb), Rabbit Fc fusion     | N3783          | NanoTag Biotechnologies | NbPSD95 fused to rabbit IgG Fc domain               | WB, 1 <sup>st</sup> Ab                           | 1:1000             |
| Fig. 2C          | upper right panel                | sdAb anti-RbIgG HRP                                            | N2405-HRP      | NanoTag Biotechnologies | HRP-conjugated anti-Rabbit IgG nanobody             | WB, 2 <sup>nd</sup> Ab                           | 1:4000             |
| Fig. 2D          |                                  | FluoTag-X2 anti-PSD95 AZDye568                                 | N3702-AF568-L  | NanoTag Biotechnologies | Fluorophore-conjugated NbPSD95                      | IF, direct                                       | 1:500              |
| Fig. 2D          |                                  | FluoTag-X2 anti-GFAP Atto488                                   | N3802-At488-L  | NanoTag Biotechnologies | Fluorophore-conjugated anti-GFAP nanobody           | IF, direct                                       | 1:500              |
| Fig. 3A, Fig. 3B | upper row                        | FluoTag-X2 anti-PSD95 AbberiorStar635P                         | N3702-Ab635P-L | NanoTag Biotechnologies | Fluorophore-conjugated NbPSD95                      | IF, direct<br>IF, direct                         | 14 nM<br>1 nM      |
| Fig. 3A, Fig. 3B | middle row                       | Recombinant anti-PSD95 Antibody (R-hcAb), Mouse IgG2 Fc fusion | N3785          | NanoTag Biotechnologies | NbPSD95 fused to mouse IgG2 Fc domain               | IF, 1 <sup>st</sup> Ab<br>IF, 1 <sup>st</sup> Ab | 14 nM<br>1 nM      |
| Fig. 3A, Fig. 3B | lower row                        | Monoclonal anti-PSD95 antibody                                 | MABN68         | Millipore               | Monoclonal antibody (Mouse IgG2)                    | IF, 1 <sup>st</sup> Ab<br>IF, 1 <sup>st</sup> Ab | 14 nM<br>1 nM      |
| Fig. 3A, B       | two lower rows                   | FluoTag-X2 anti-Mouse IgG2 AbberiorStar635P                    | N2702-Ab635P   | NanoTag Biotechnologies | Fluorophore-conjugated anti-Mouse IgG2 nanobody     | IF. 2 <sup>nd</sup> Ab                           | 1:500              |
| Fig. 3           |                                  | FluoTag-X2 anti-Syt1 AZDye568                                  | N2302-AF568-L  | NanoTag Biotechnologies | Fluorophore-conjugated anti-Synaptotagmin1 nanobody | IF, direct                                       | 1:500              |
| Fig. 3           |                                  | FluoTag-X2 anti-GFAP Atto488                                   | N3802-At488-L  | NanoTag Biotechnologies | Fluorophore-conjugated anti-GFAP nanobody           | IF. direct                                       | 1:500              |

**Table S1: Antibodies (continued)**

| Figure | Panel(s) | Product                                                    | Product number | Provider                | Description                                         | Application               | Dilution/ Conc.                                   |
|--------|----------|------------------------------------------------------------|----------------|-------------------------|-----------------------------------------------------|---------------------------|---------------------------------------------------|
| Fig. 4 |          | FluoTag-X2 anti-PSD95 AbberiorStar635P                     | N3702-Ab635P-L | NanoTag Biotechnologies | Fluorophore-conjugated NbPSD95                      | IF, direct                | 1:500                                             |
| Fig. 4 |          | FluoTag-X2 anti-Syt1 AZDye568                              | N2302-AF568-L  | NanoTag Biotechnologies | Fluorophore-conjugated anti-Synaptotagmin1 nanobody | IF, direct                | 1:500                                             |
| Fig. 4 |          | FluoTag-X2 anti-GFAP Atto488                               | N3802-At488-L  | NanoTag Biotechnologies | Fluorophore-conjugated anti-GFAP nanobody           | IF, direct                | 1:500                                             |
| Fig. 5 |          | FluoTag-X2 anti-PSD95 Sulfo-Cy3                            | N3702-SC3-L    | NanoTag Biotechnologies | Fluorophore-conjugated NbPSD95                      | IHC, direct               | 1:500                                             |
| Fig. 6 |          | FluoTag-X2 anti-PSD95 AbberiorStar635P                     | N3702-Ab635P-L | NanoTag Biotechnologies | Fluorophore-conjugated NbPSD95                      | IHC, direct               | 1:500                                             |
| Fig. 6 |          | Recombinant anti-Synaptotagmin antibody                    | 105 008        | Synaptic Systems        | Rabbit monoclonal recombinant antibody              | IHC, 1 <sup>st</sup> Ab   | 2 µg/mL                                           |
| Fig. 6 |          | FluoTag-X2 anti-Rabbit IgG AbberiorStar580                 | N2402-Ab580-L  | NanoTag Biotechnologies | Fluorophore-conjugated anti-Rabbit IgG2 nanobody    | IHC, 2 <sup>nd</sup> Ab   | 1:500                                             |
| Fig. 7 |          | Recombinant anti-PSD95 Antibody (R-hcAb), Rabbit Fc fusion | N3783          | NanoTag Biotechnologies | NbPSD95 fused to rabbit IgG Fc domain               | IHC-P, 1 <sup>st</sup> Ab | 1 µg/mL                                           |
| Fig. 7 |          | Secondary anti-Rabbit Biotin                               | 111-065-144    | Jackson Immuno Research | Biotin-SP AffiniPure Goat Anti-Rabbit IgG           | IHC-P, 2 <sup>nd</sup> Ab | 5 µg/ml                                           |
| Fig. 7 |          | Avidin-Biotin Complex (ABC)-HRP Kit                        | PK-4000        | Vector Laboratories     | ABC-HRP Kit                                         | IHC-P, amplification      | prepared according to manufacturer's instructions |

**Table S1: Antibodies (continued)**

| Figure                | Panel(s)                              | Product                                                           | Product number | Provider                | Description                                         | Application                                      | Dilution/<br>Conc. |
|-----------------------|---------------------------------------|-------------------------------------------------------------------|----------------|-------------------------|-----------------------------------------------------|--------------------------------------------------|--------------------|
| Fig. S1A              |                                       | Recombinant anti-PSD95 Antibody (R-hcAb),<br>Mouse IgG1 Fc fusion | N3782          | NanoTag Biotechnologies | NbPSD95 fused to mouse IgG1 Fc domain               | WB, 1 <sup>st</sup> Ab                           | 1:1000             |
| Fig. S1A              |                                       | sdAb anti-MslgG1 HRP                                              | N2005-HRP      | NanoTag Biotechnologies | HRP-coupled anti-Mouse IgG1 nanobody                | WB, 2 <sup>nd</sup> Ab                           | 1:4000             |
| Fig. S1B              |                                       | Recombinant anti-PSD95 Antibody (R-hcAb),<br>Mouse IgG2 Fc fusion | N3785          | NanoTag Biotechnologies | NbPSD95 fused to mouse IgG2 Fc domain               | WB, 1 <sup>st</sup> Ab                           | 1:1000             |
| Fig. S1B              |                                       | sdAb anti-MslgG2 HRP                                              | N2705-HRP      | NanoTag Biotechnologies | HRP-coupled anti-Mouse IgG2 nanobody                | WB, 2 <sup>nd</sup> Ab                           | 1:4000             |
| Fig. S1C              |                                       | Recombinant anti-PSD95 Antibody (R-hcAb),<br>Rabbit Fc fusion     | N3783          | NanoTag Biotechnologies | NbPSD95 fused to rabbit IgG Fc domain               | WB, 1 <sup>st</sup> Ab                           | 1:1000             |
| Fig. S1C              |                                       | sdAb anti-RblgG HRP                                               | N2405-HRP      | NanoTag Biotechnologies | HRP-coupled anti-Rabbit IgG nanobody                | WB, 2 <sup>nd</sup> Ab                           | 1:4000             |
| Fig. S2A,<br>Fig. S2B | 1 <sup>st</sup> rows                  | FluoTag-X2 anti-PSD95 AbberiorStar635P                            | N3702-Ab635P-L | NanoTag Biotechnologies | Fluorophore-conjugated NbPSD95                      | IF, direct<br>IF, direct                         | 14 nM<br>1 nM      |
| Fig. S2A,<br>Fig. S2B | 2 <sup>nd</sup> rows                  | Recombinant anti-PSD95 Antibody (R-hcAb),<br>Mouse IgG2 Fc fusion | N3785          | NanoTag Biotechnologies | NbPSD95 fused to mouse IgG2 Fc domain               | IF, 1 <sup>st</sup> Ab<br>IF, 1 <sup>st</sup> Ab | 14 nM<br>1 nM      |
| Fig. S2A,<br>Fig. S2B | 3 <sup>rd</sup> rows                  | Monoclonal anti-PSD95 antibody                                    | MABN68         | Millipore               | Monoclonal antibody (Mouse IgG2)                    | IF, 1 <sup>st</sup> Ab<br>IF, 1 <sup>st</sup> Ab | 14 nM<br>1 nM      |
| Fig. S2A, B           | 2 <sup>nd</sup> /3 <sup>rd</sup> rows | FluoTag-X2 anti-Mouse IgG2 AbberiorStar635P                       | N2702-Ab635P   | NanoTag Biotechnologies | Fluorophore-conjugated anti-Mouse IgG2 nanobody     | IF, 2 <sup>nd</sup> Ab                           | 1:500              |
| Fig. S2               |                                       | FluoTag-X2 anti-Syt1 AZDye568                                     | N2302-AF568-L  | NanoTag Biotechnologies | Fluorophore-conjugated anti-Synaptotagmin1 nanobody | IF, direct                                       | 1:500              |
| Fig. S2               |                                       | FluoTag-X2 anti-GFAP Atto488                                      | N3802-At488-L  | NanoTag Biotechnologies | Fluorophore-conjugated anti-GFAP nanobody           | IF, direct                                       | 1:500              |

**IF:** Immunofluorescence; **IHC:** Immunohistochemistry; **IHC-P:** Immunohistochemistry on paraffin-embedded sections, **WB:** Western blot; **1<sup>st</sup> Ab:** Primary antibody; **2<sup>nd</sup> Ab:** Secondary antibody
